# Supplementary material
Source: Springer Nature journal article supplement (https://www.springermedizin.de/resource/supplementary/12871_2014_288_MOESM4_ESM.pdf/9429264)
Supplement: MOESM4 [file 9429264]

**Framing the  
topic**

**Open  
Discussion**

**Identifying  
Underlying  
Concerns**

**Collaborative  
Proposal  
Building**

**Choosing a  
Direction**

**Synthesizing  
a Final  
Proposal**

**Closure**
